# Supplementary material for: Alloying and confinement effects on hierarchically nanoporous CuAu for efficient electrocatalytic semi-hydrogenation of terminal alkynes
Source: PubMed Central journal article supplement (PMC11252328; doi:10.1038/s41467-024-50499-3), 2024-07-17
Supplement: 41467_2024_50499_MOESM1_ESM.pdf [file 41467_2024_50499_MOESM1_ESM.pdf]

# **Alloying and Confinement effects on Hierarchically Nanoporous CuAu for Efficient Electrocatalytic Semi-Hydrogenation of Terminal Alkynes**

Linghu Meng<sup>1,5</sup>, Cheng-Wei Kao<sup>2,5</sup>, Zhen Wang<sup>1,5</sup>, Jun Ma<sup>3</sup>, Peifeng Huang<sup>3</sup>, Nan Zhao<sup>4</sup>, Xin Zheng<sup>4</sup>, Ming Peng<sup>1</sup>, Ying-Rui Lu<sup>2</sup>, Yongwen Tan<sup>1\*</sup>

<sup>1</sup>College of Materials Science and Engineering, State Key Laboratory of Advanced Design and Manufacturing Technology for Vehicle Body, Hunan University, Changsha, Hunan 410082, China

<sup>2</sup>National Synchrotron Radiation Research Center, Hsinchu, 300092, Taiwan

<sup>3</sup>College of Mechanical and vehicle Engineering, Hunan University, Changsha, Hunan 410082, China

<sup>4</sup>Electrical Power Research Institute of Yunnan Power Grid Co. Ltd, North China Electric Power, Kunming, Yunnan, 650217, China

<sup>5</sup>Linghu Meng, Cheng-Wei Kao and Zhen Wang contributed equally to this work

\*e-mail: tanyw@hnu.edu.cn

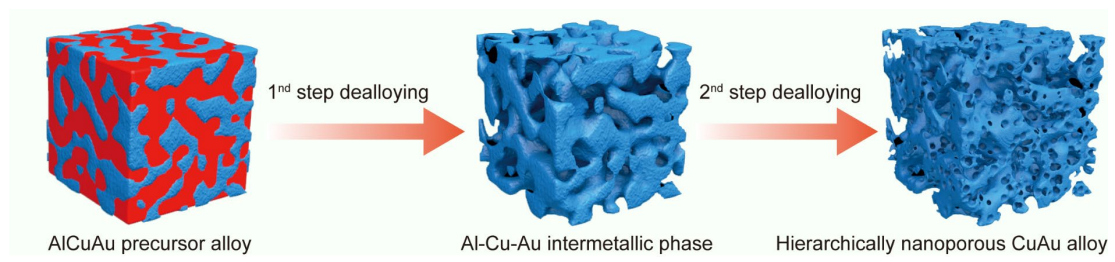

**Supplementary Fig. 1| Schematic illustration of the preparation of Hnp-Cu<sub>100-x</sub>Au<sub>x</sub>.** Illustration of the synthetic process of Hnp-Cu<sub>100-x</sub>Au<sub>x</sub>.

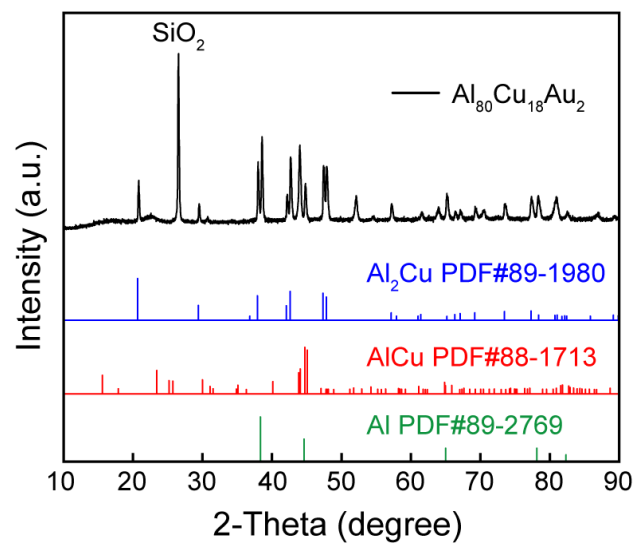

**Supplementary Fig. 2 | XRD characterizations of  $\text{Al}_{80}\text{Cu}_{18}\text{Au}_2$ .** XRD patterns of the  $\text{Al}_{80}\text{Cu}_{18}\text{Au}_2$ .

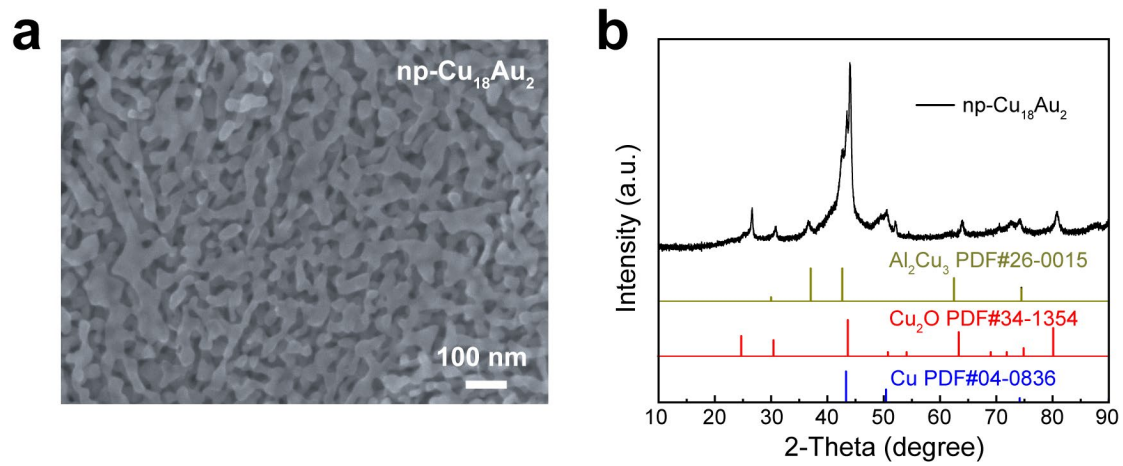

**Supplementary Fig. 3 | SEM and XRD characterizations of np-Cu<sub>18</sub>Au<sub>2</sub>.** (a) SEM images of the np-Cu<sub>18</sub>Au<sub>2</sub>, (b) XRD patterns of the np-Cu<sub>18</sub>Au<sub>2</sub>.

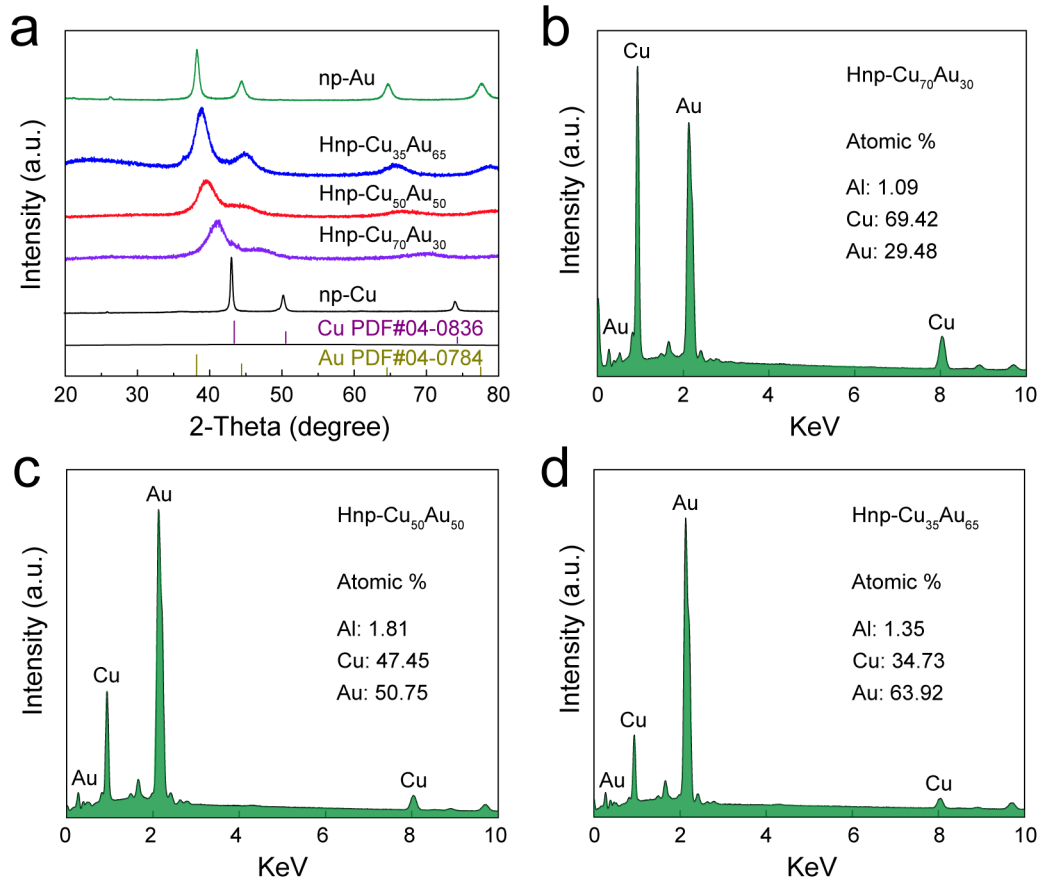

**Supplementary Fig. 4 | XRD and EDS characterizations.** (a) XRD patterns of np-Cu, Hnp-Cu<sub>70</sub>Au<sub>30</sub>, Hnp-Cu<sub>50</sub>Au<sub>50</sub>, Hnp-Cu<sub>35</sub>Au<sub>65</sub> and np-Au. (b-d) EDS spectra of the Hnp-Cu<sub>70</sub>Au<sub>30</sub>, Hnp-Cu<sub>50</sub>Au<sub>50</sub> and Hnp-Cu<sub>35</sub>Au<sub>65</sub>.

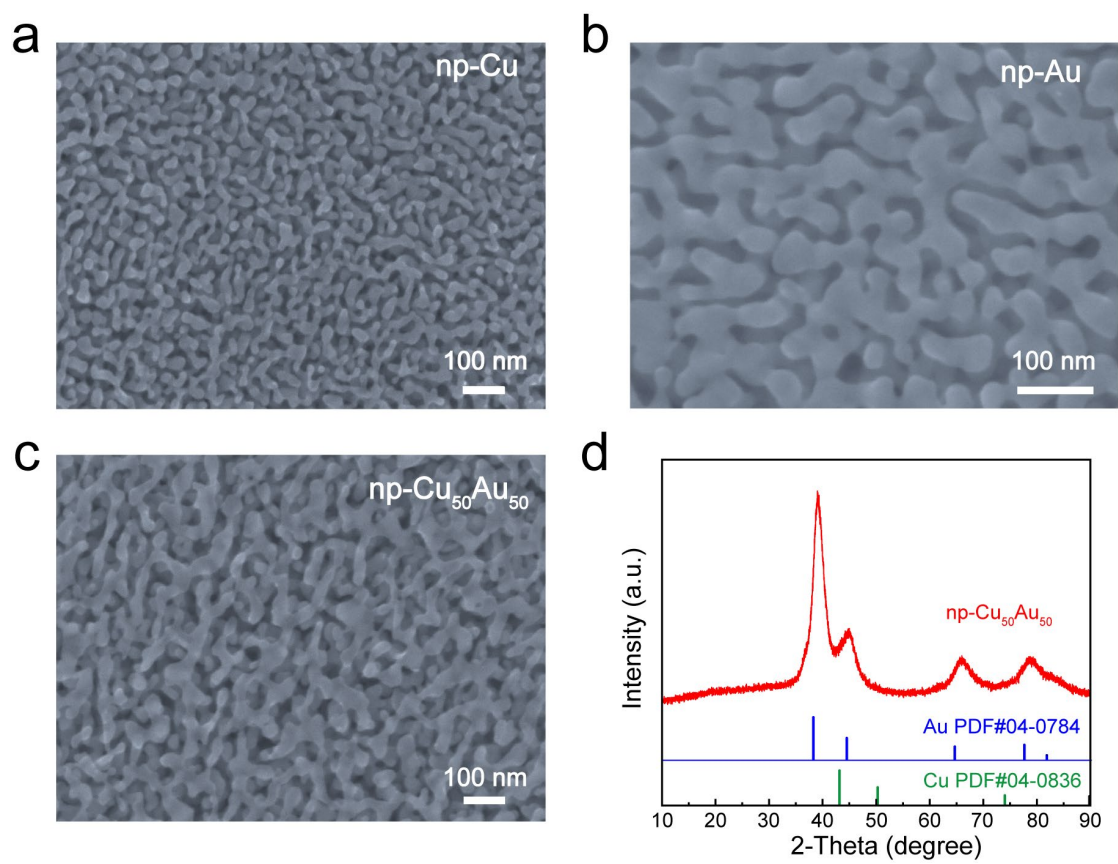

**Supplementary Fig. 5 | SEM and XRD characterizations.** (a-c) SEM images of (a) np-Cu, (b) np-Au and (c) np-Cu<sub>50</sub>Au<sub>50</sub>. (d) XRD patterns of the np-Cu<sub>50</sub>Au<sub>50</sub>.

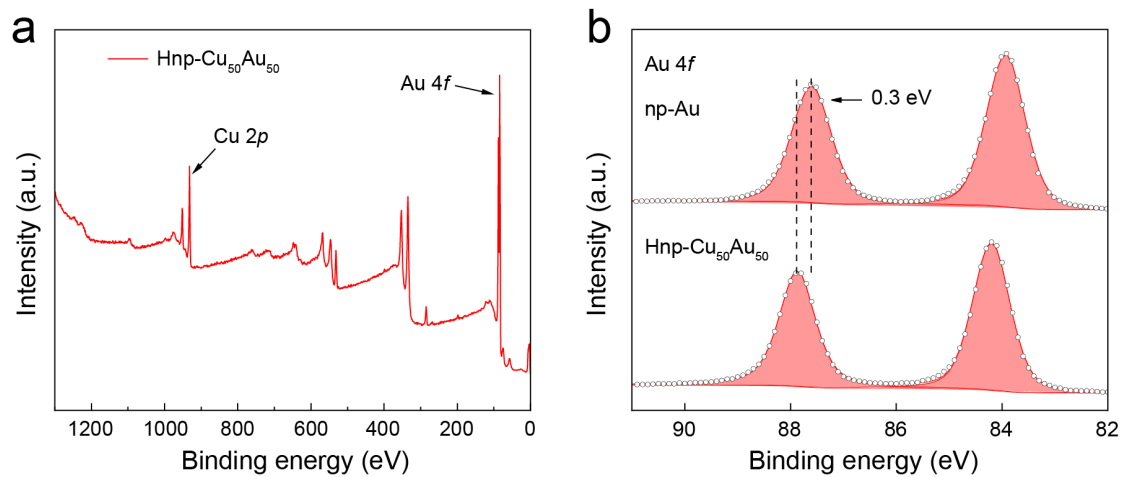

**Supplementary Fig. 6 | XPS characterizations.** (a) XPS full spectra of Hnp-Cu<sub>50</sub>Au<sub>50</sub>, (b) XPS spectra of Hnp-Cu<sub>50</sub>Au<sub>50</sub> and np-Au in Au 4f.

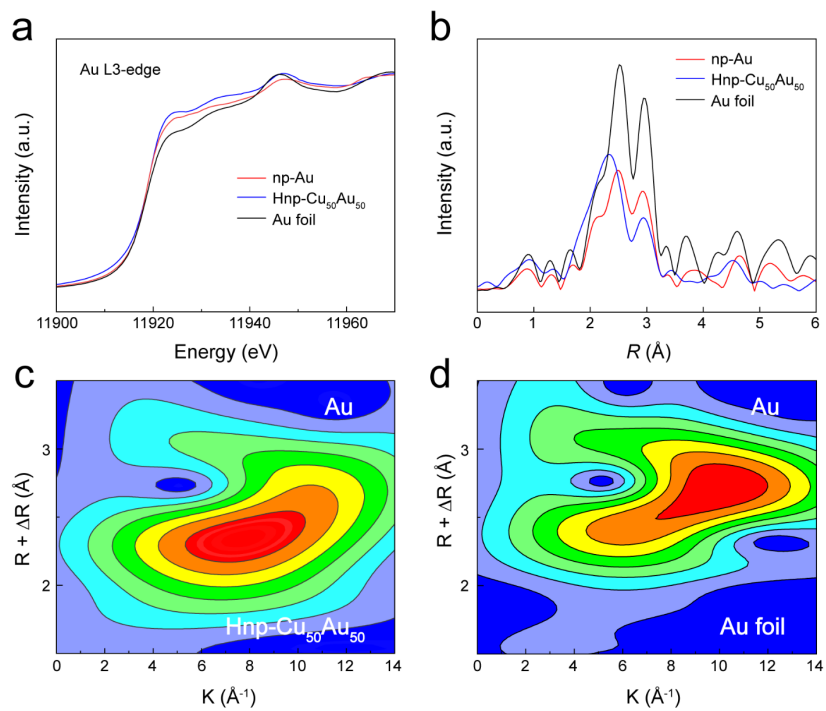

**Supplementary Fig. 7 | Synchrotron radiation characterization of the np-Au and Hnp-Cu<sub>50</sub>Au<sub>50</sub>.** (a) Normalized XANES at the Au L3-edge of Hnp-Cu<sub>50</sub>Au<sub>50</sub>, np-Au, Au foil. (b) The corresponding FT-EXAFS spectra of the Au L3-edge derived from (a). (c, d) WT of Au L3-edge EXAFS spectra of Hnp-Cu<sub>50</sub>Au<sub>50</sub> and Au foil.



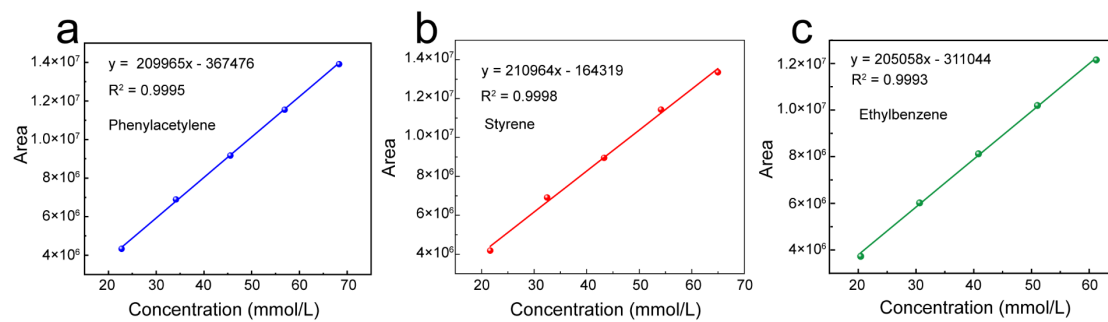

**Supplementary Fig. 8 | The GC-MS standard curves for quantitative analysis. (a)**

Phenylacetylene, (b) Styrene and (c) Ethylbenzene.

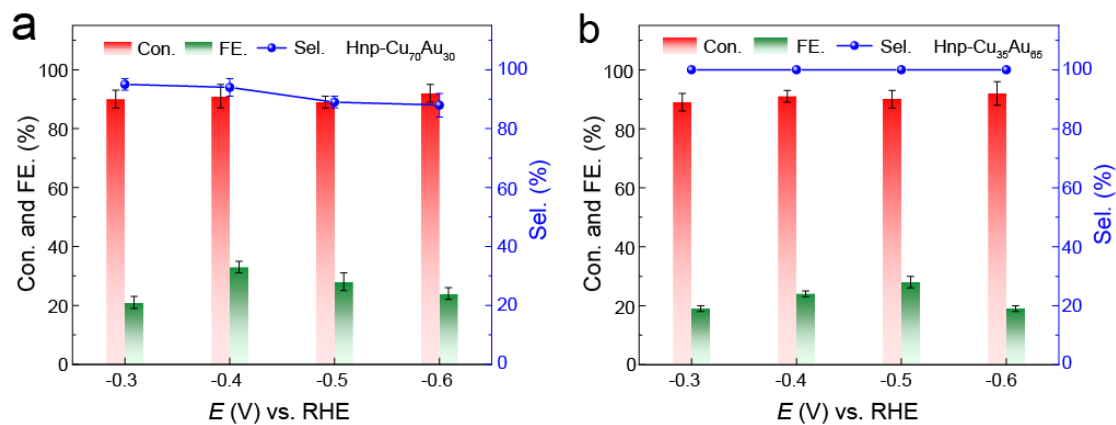

**Supplementary Fig. 9 | Electrocatalytic performance of Hnp-Cu<sub>70</sub>Au<sub>30</sub> and Hnp-Cu<sub>35</sub>Au<sub>65</sub> for alkyne semi-hydrogenation.** Potential-dependent conversions of phenylacetylene, selectivity and FE of styrene over (a) Hnp-Cu<sub>70</sub>Au<sub>30</sub>, (b) Hnp-Cu<sub>35</sub>Au<sub>65</sub> in 1 M KOH. The error bars represent the standard deviation for at least three independent measurements.

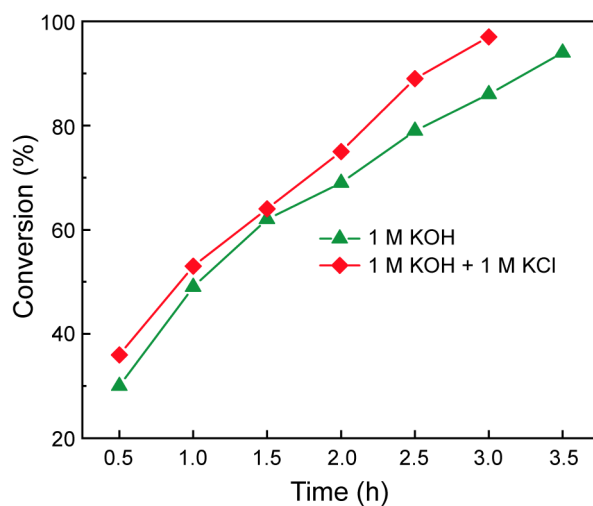

**Supplementary Fig. 10| Time-dependent conversion of phenylacetylene in 1 M KOH with and without 1 M KCl.** Time-dependent conversion change of phenylacetylene with and without 1 M KCl over Hnp-Cu<sub>50</sub>Au<sub>50</sub> at -0.6 V versus RHE.

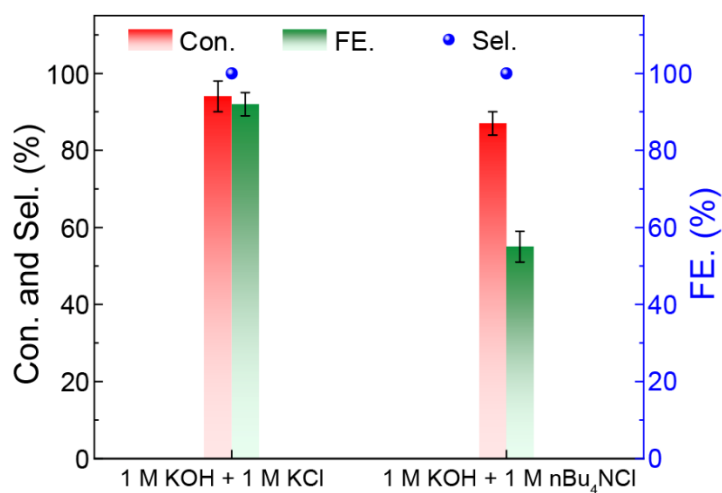

**Supplementary Fig. 11| Electrocatalytic performance for alkyne semi-hydrogenation in 1 M KOH with 1 M KCl and 1 M nBu<sub>4</sub>NCl.** Conversions of phenylacetylene, selectivity and FE of styrene over Hnp-Cu<sub>50</sub>Au<sub>50</sub> in 1 M KOH + 1 M KCl and 1 M KOH + 1 M nBu<sub>4</sub>NCl. The error bars represent the standard deviation for at least three independent measurements.

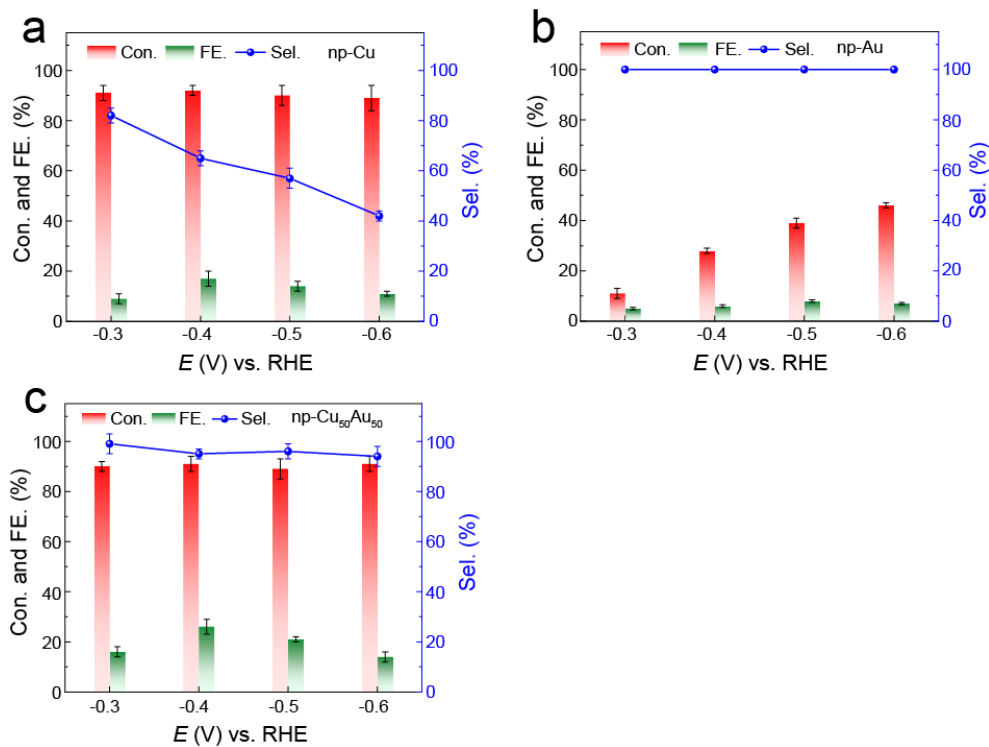

**Supplementary Fig. 12 | Electrocatalytic performance of catalysts for alkyne semi-hydrogenation.** Potential-dependent conversions of phenylacetylene, selectivity and FE of styrene in 1 M KOH + 1 M KCl over (a) np-Cu, (b) np-Au and (c) np-Cu<sub>50</sub>Au<sub>50</sub>. The error bars represent the standard deviation for at least three independent measurements.

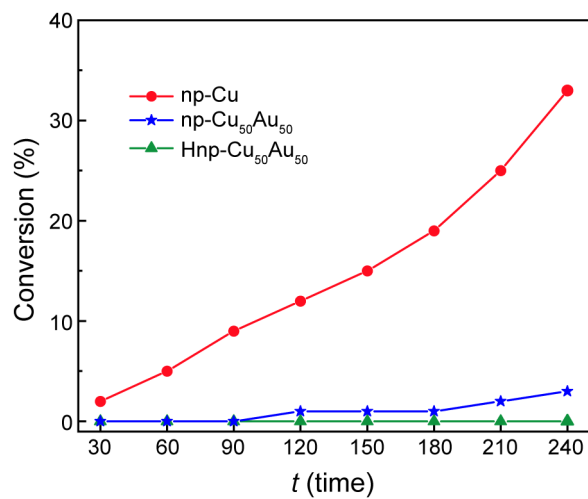

**Supplementary Fig. 13| Time-dependent conversion of styrene.** Time-dependent conversions of styrene over np-Cu, np-Cu<sub>50</sub>Au<sub>50</sub>, and Hnp-Cu<sub>50</sub>Au<sub>50</sub>.

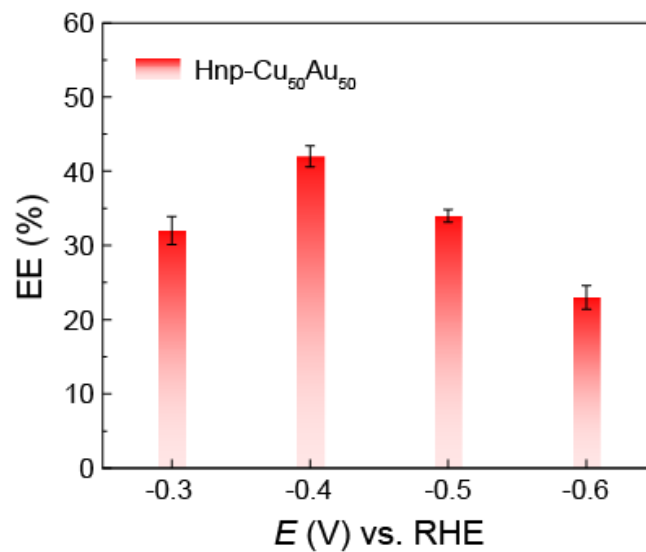

**Supplementary Fig. 14| The energy efficiency of alkyne semi-hydrogenation.** The energy efficiency of Hnp-Cu<sub>50</sub>Au<sub>50</sub> for semi-hydrogenation of phenylacetylene at different applied potentials.

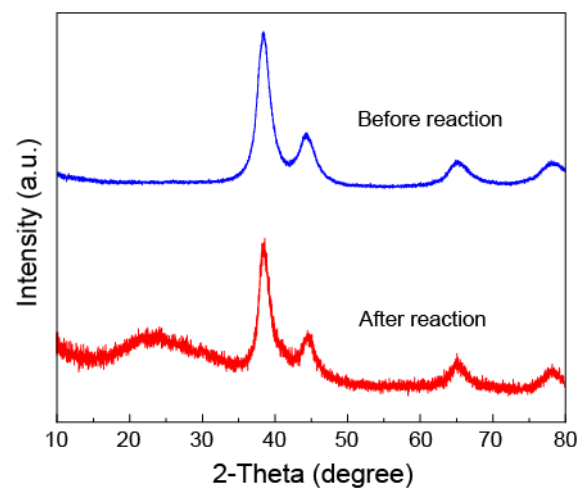

**Supplementary Fig. 15| XRD characterizations of Hnp-Cu<sub>50</sub>Au<sub>50</sub>.** XRD patterns of Hnp-Cu<sub>50</sub>Au<sub>50</sub> before and after reaction.



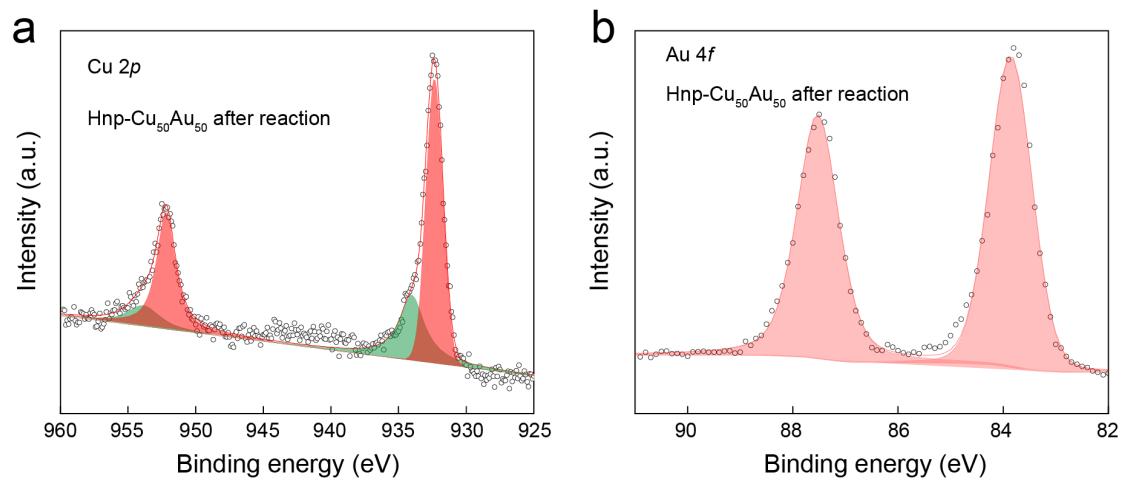

**Supplementary Fig. 16 | XPS Characterizations of the Hnp-Cu<sub>50</sub>Au<sub>50</sub> after reaction.**

(a) Cu 2*p* XPS spectra. (b) Au 4*f* XPS spectra.

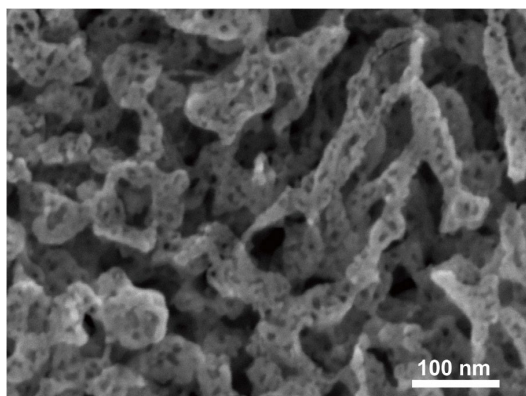

**Supplementary Fig. 17| SEM characterizations of Hnp-Cu<sub>50</sub>Au<sub>50</sub> after reaction.**

SEM image of Hnp-Cu<sub>50</sub>Au<sub>50</sub> alloy after reaction.

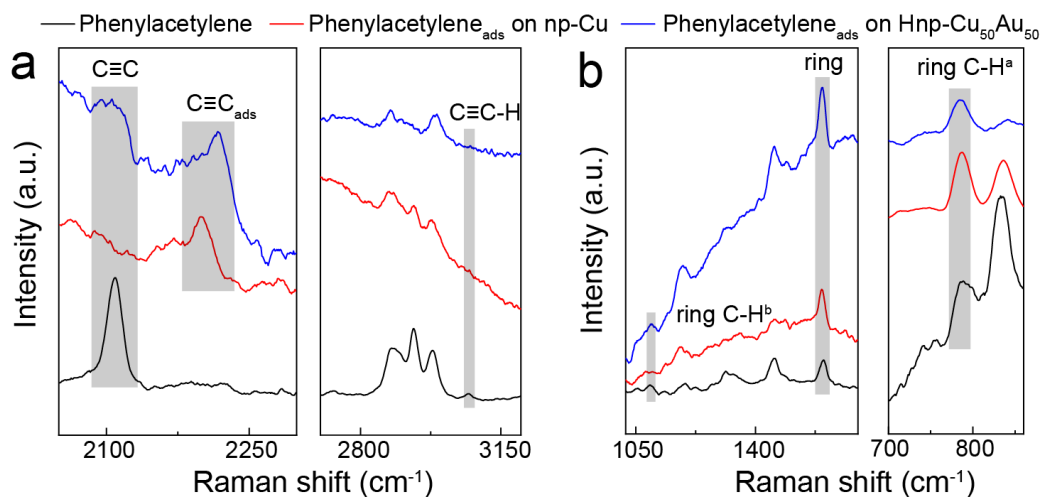

**Supplementary Fig. 18| In situ Raman spectra for the electrocatalytic hydrogenation of phenylacetylene.** In situ Raman tests in a mixed 1.0 M KOH/Diox solution for electrocatalytic hydrogenation of phenylacetylene at  $-0.4$  V vs. RHE over (a) np-Cu, (b) Hnp-Cu<sub>50</sub>Au<sub>50</sub>.

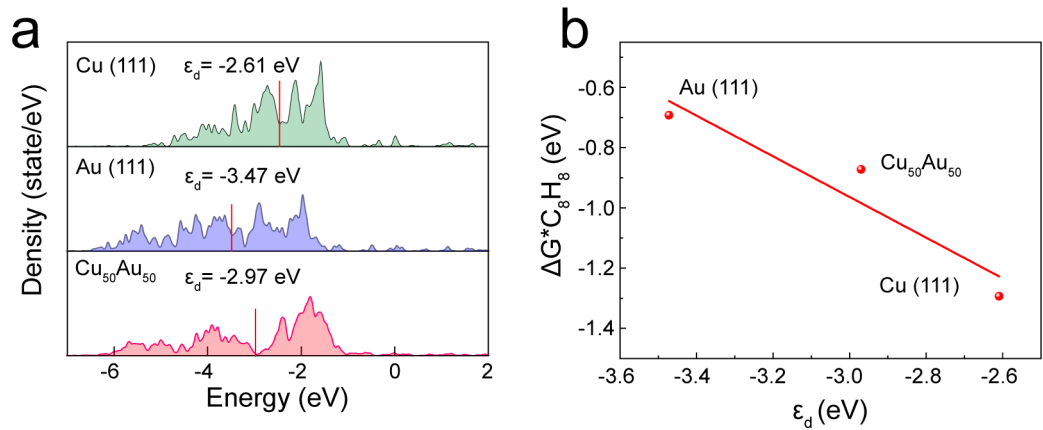

**Supplementary Fig. 19| DFT calculations.** (a) PDOS of Cu (111), Au (111) and Cu<sub>50</sub>Au<sub>50</sub>, (b) the relationship between d-band center and free energy of \*C<sub>8</sub>H<sub>8</sub> adsorption.

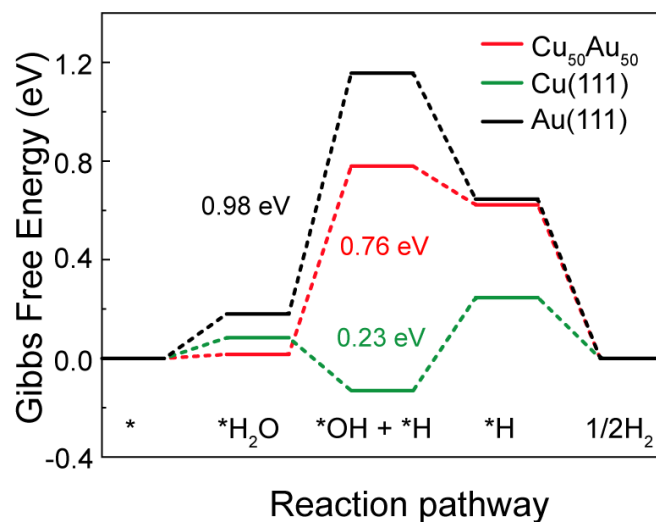

**Supplementary Fig. 20 | Free energy diagram for water-splitting process.** Free energy diagram for water-splitting process over Cu (111), Au (111), and  $Cu_{50}Au_{50}$ .

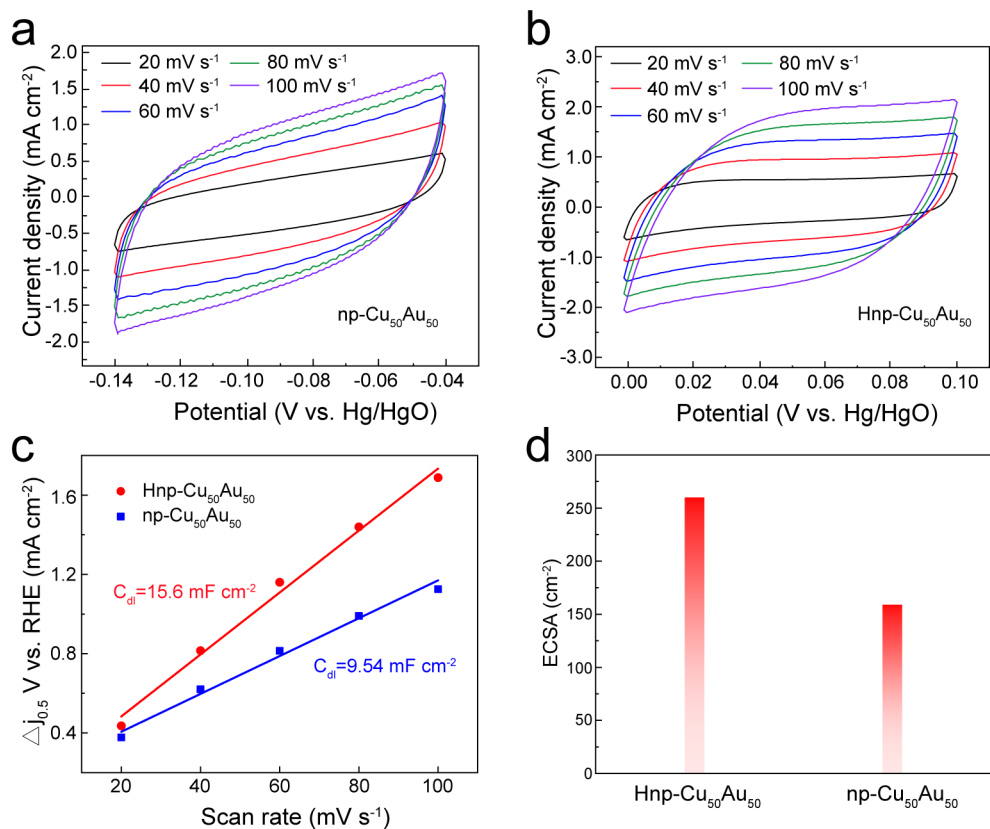

**Supplementary Fig. 21 | Double-layer capacitance analyses.** (a, b) CVs of np-Cu<sub>50</sub>Au<sub>50</sub> (a) and Hnp-Cu<sub>50</sub>Au<sub>50</sub> (b). These CVs were performed at various scan rates 20, 40, 60, 80, and 100 mV s<sup>-1</sup>. (c) The plots of current densities against scan rates.  $\Delta j$  is the difference between anodic and cathodic current densities at a same potential (0.05 V. vs. RHE). (d) The electrochemically active surface areas (ECSAs) of Hnp-Cu<sub>50</sub>Au<sub>50</sub> and np-Cu<sub>50</sub>Au<sub>50</sub>.

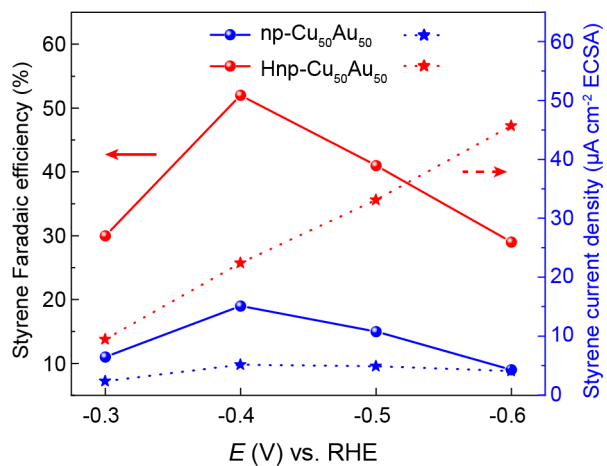

**Supplementary Fig. 22| The comparison of styrene FE and ECSA-normalized styrene current density.** The styrene FE and ECSA-normalized styrene current density comparison between Hnp-Cu<sub>50</sub>Au<sub>50</sub> and np-Cu<sub>50</sub>Au<sub>50</sub> in 1 M KOH.

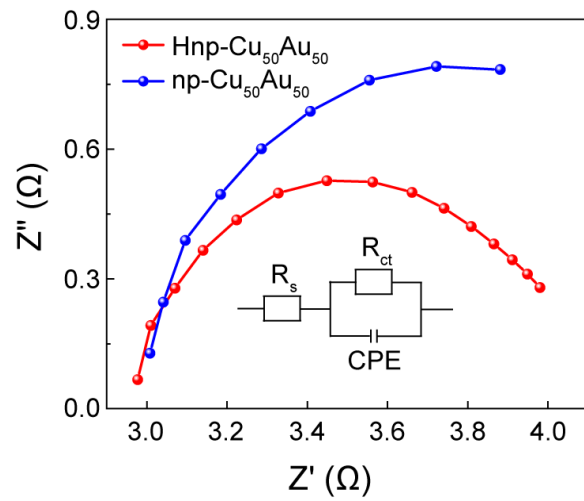

**Supplementary Fig. 23| Electrochemical impedance spectroscopy analyses.**

Nyquist plots of Hnp-Cu<sub>50</sub>Au<sub>50</sub> and np-Cu<sub>50</sub>Au<sub>50</sub> at -0.4 V vs. RHE. Inset: equivalent circuit for EIS fitting.



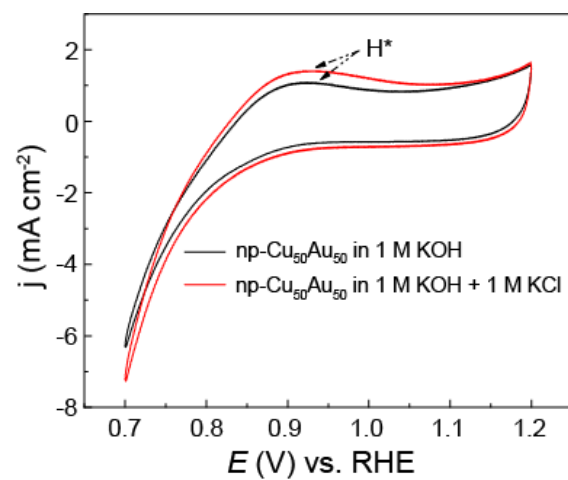

**Supplementary Fig. 24** CV curves of np-Cu<sub>50</sub>Au<sub>50</sub> in 1 M KOH with or without 1 M KCl. CV curves of np-Cu<sub>50</sub>Au<sub>50</sub> in 1 M KOH and 1 M KOH + 1 M KCl with a scan rate of 100 mV s<sup>-1</sup>.

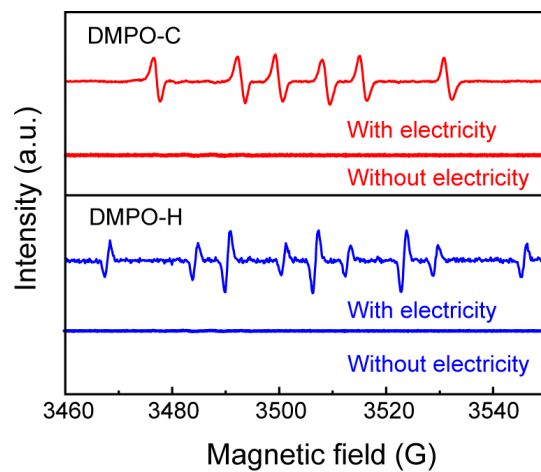

**Supplementary Fig. 25| Quasi-in situ EPR tests.** Quasi-in situ EPR trapping for carbon and hydrogen radicals over Hnp-Cu<sub>50</sub>Au<sub>50</sub> at -0.4 V vs. RHE.

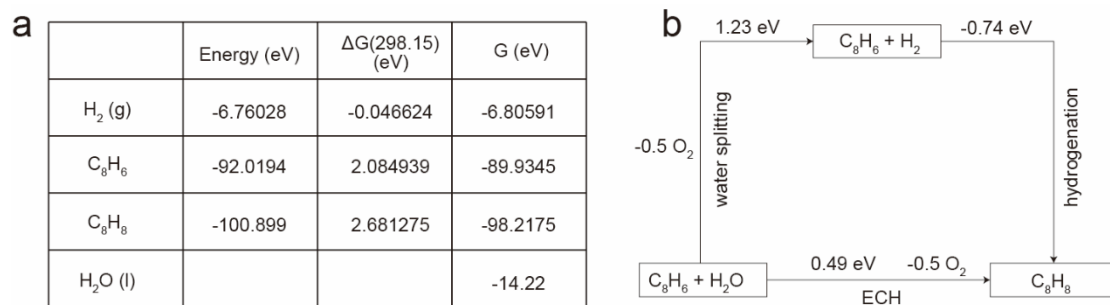

**Supplementary Fig. 26| Standard equilibrium potential of phenylacetylene to styrene.** (a) Standard Gibbs free energies of H<sub>2</sub>(g), C<sub>8</sub>H<sub>6</sub>, C<sub>8</sub>H<sub>8</sub> and H<sub>2</sub>O(l). (b) The standard equilibrium potential of phenylacetylene-to-styrene conversion routes.

**Supplementary Table 1.** Summary of conversion (Con), selectivity (Sel.) and Faradaic efficiency (FE) values of the reported catalysts in the electrocatalytic semi-hydrogenation of alkynes to alkenes.

| Catalyst                              | Reactant                                                                            | Product                                                                             | Con (%) | Sel (%) | FE (%) | Reference |
|---------------------------------------|-------------------------------------------------------------------------------------|-------------------------------------------------------------------------------------|---------|---------|--------|-----------|
| Hnp-Cu <sub>50</sub> Au <sub>50</sub> | 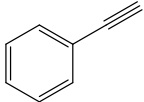   |    | 94      | 100     | 92     | This work |
| Pt/W <sub>2</sub> C-7.4               |    |    | 32      | 95      | 53     | [1]       |
| PdFe                                  |    |    | 96.1    | 92.9    | —      | [2]       |
| PdCu                                  |   |    | 97.4    | 93.0    | 9.5    | [3]       |
| PdP                                   |  |  | 92      | 98      | 78     | [4]       |
| Pd <sub>2</sub> N                     |  |  | 95.7    | 97.8    | 72.4   | [5]       |
| Pd@ArS-Pd <sub>4</sub> S              |  |  | 97      | 96      | 75     | [6]       |
| Cu-S                                  |  |  | 99      | 99      | 10     | [7]       |
| PdS <sub>x</sub>                      |  |  | 67      | 98      | 28     | [8]       |

**Supplementary Table 2.** Substrate scope for electrocatalytic semi-hydrogenation of alkynes with H<sub>2</sub>O over a Hnp-Cu<sub>50</sub>Au<sub>50</sub> cathode.

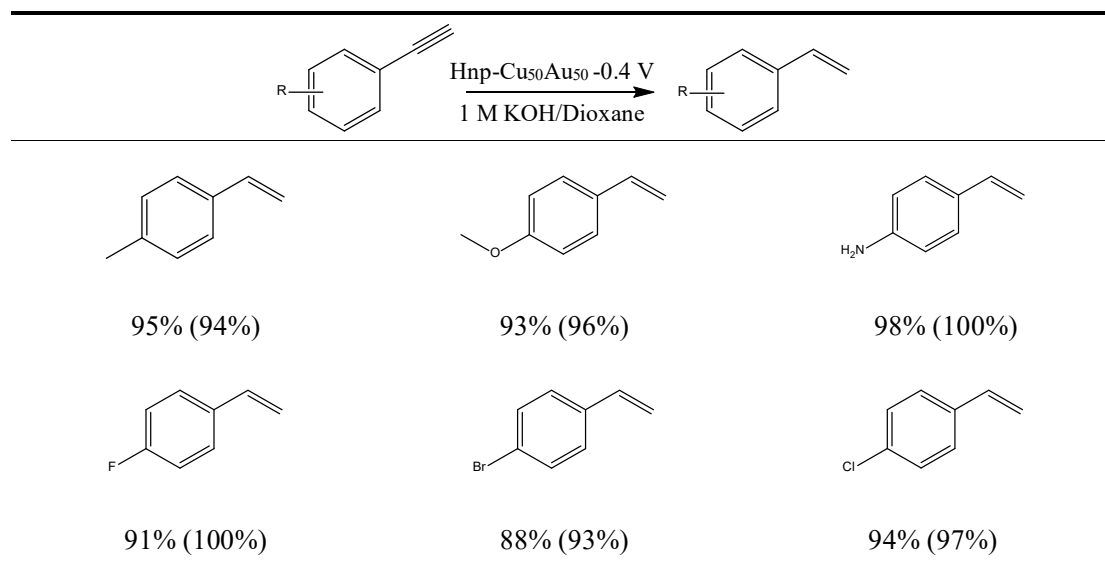

Reaction conditions: alkynes substrates (1 mmol), Hnp-Cu<sub>50</sub>Au<sub>50</sub> (working area: 1 cm<sup>2</sup>), 1 M KOH (Dioxane/H<sub>2</sub>O), room temperature, -0.4 V vs. RHE. Conversion yields were reported, and the data in parentheses were the alkene selectivity.

## Supplementary References

1. Xiu L. et al. Enrichment of polarized alkynes over negatively charged Pt for efficient electrocatalytic semihydrogenation. *ACS Catal.* **14**, 2173–2180 (2024).
2. Zhu, K. et al. Unraveling the role of interfacial water structure in electrochemical semihydrogenation of alkynes. *ACS Catal.* **12**, 4840–4847 (2022).
3. Xu, X. et al. Regulating the interfacial water structure by tensile strain to boost electrochemical semi-hydrogenation of alkynes. *Inorg. Chem. Front.* **9**, 3444 (2022)
4. Wu, Y., Liu, C., Wang, C., Lu, S. & Zhang, B. Selective transfer semihydrogenation of alkynes with H<sub>2</sub>O (D<sub>2</sub>O) as the H (D) source over a Pd-P cathode. *Angew. Chem. Int. Ed.* **59**, 21170–21175 (2020).
5. Song, Z. et al. Interstitial modification of palladium nanocubes with nitrogen atoms promotes aqueous electrocatalytic alkyne semihydrogenation. *ACS Mater. Lett.* **5**, 3068–3073 (2023).
6. Gao, Y. et al. Field-induced reagent concentration and sulfur adsorption enable efficient electrocatalytic semihydrogenation of alkynes. *Sci. Adv.* **8**, eabm9477 (2022).
7. Wu, Y. et al. Converting copper sulfide to copper with surface sulfur for electrocatalytic alkyne semihydrogenation with water. *Nat. Commun.* **12**, 3881 (2021).
8. Li, H. et al.  $\sigma$ -alkynyl adsorption enables electrocatalytic semihydrogenation of terminal alkynes with easy-reducible/passivated groups over amorphous PdS<sub>x</sub> nanocapsules. *J. Am. Chem. Soc.* **144**, 19456–19465 (2022).
